# Supplementary material for: Neurosphere and adherent culture conditions are equivalent for malignant glioma stem cell lines
Source: PubMed Central journal article supplement — Anat Cell Biol. 2015 Mar 20;48(1):25–35. doi: 10.5115/acb.2015.48.1.25 (PMC4371178; doi:10.5115/acb.2015.48.1.25), 2015-03-20
Supplement: acb-48-25-s001.pdf [file acb-48-25-s001.pdf]

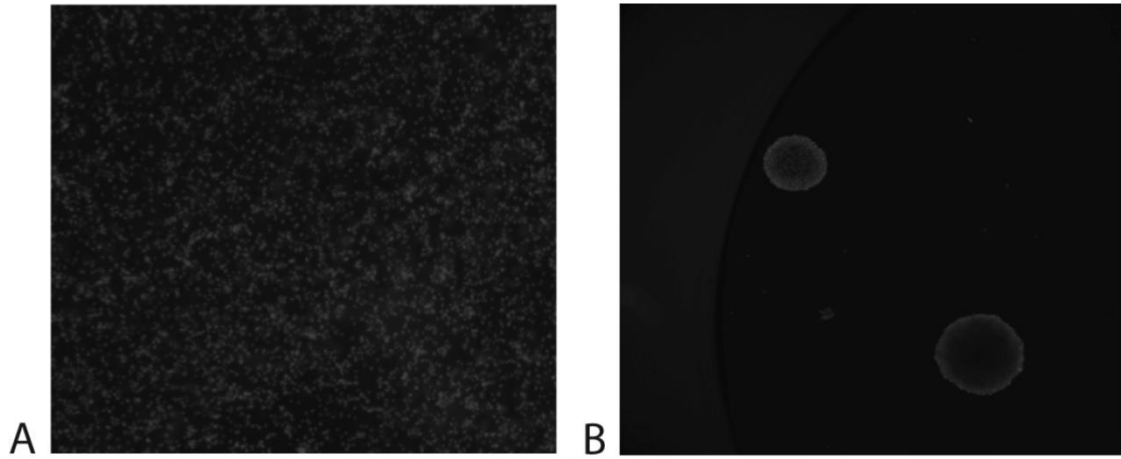

**Supplementary Fig. 1.** (A) Limiting dilution assay of cells grown using laminin. Determination of clonogenic capacity was based on ability of cell grown on laminin to fill a well. Full well shown. (B) Limiting dilution assay of cells grown using the neurosphere assay. Determination of clonogenic capacity was based on ability of cells to generate spheres. Tumor neurospheres shown.
