# Supplementary material for: Neurosphere and adherent culture conditions are equivalent for malignant glioma stem cell lines
Source: PubMed Central journal article supplement — Anat Cell Biol. 2015 Mar 20;48(1):25–35. doi: 10.5115/acb.2015.48.1.25 (PMC4371178; doi:10.5115/acb.2015.48.1.25), 2015-03-20
Supplement: acb-48-25-s002.pdf [file acb-48-25-s002.pdf]

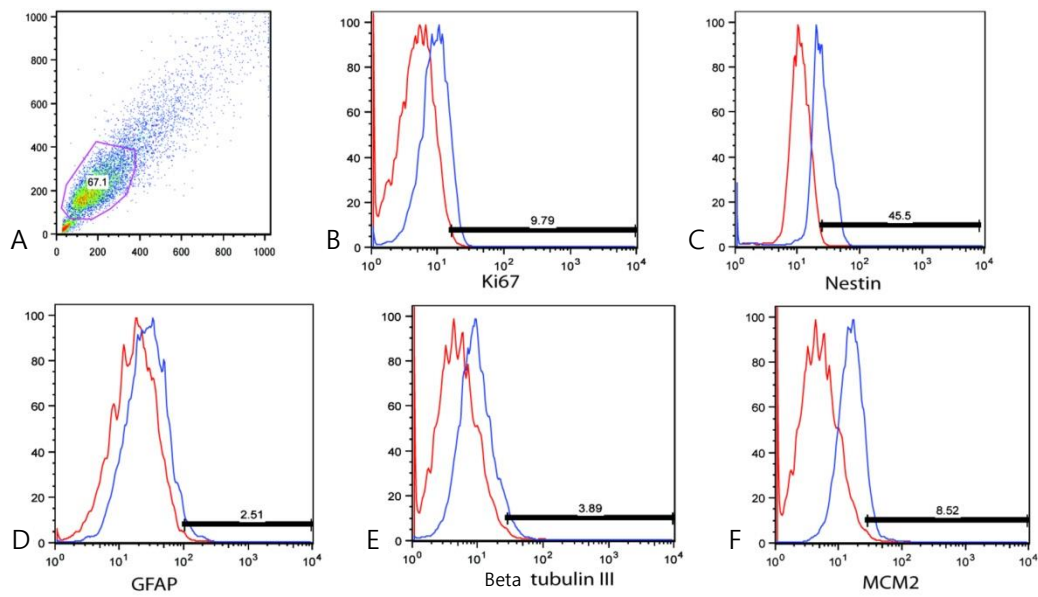

**Supplementary Fig. 2.** (A-F) Representative flow cytometry plots for marker expression using neurosphere assay (NSA) cells. Positive cells were identified by applying a gate created to separate positive and negative staining cells from the controls. (B) Ki67 staining of NSA cells. (C) Nestin staining of NSA cells. (D) Glial fibrillary acidic protein (GFAP) staining of NSA cells. (E) Beta tubulin III staining of NSA cells. (F) MCM2 staining of NSA cells.
