# Supplementary material for: Neurosphere and adherent culture conditions are equivalent for malignant glioma stem cell lines
Source: PubMed Central journal article supplement — Anat Cell Biol. 2015 Mar 20;48(1):25–35. doi: 10.5115/acb.2015.48.1.25 (PMC4371178; doi:10.5115/acb.2015.48.1.25), 2015-03-20
Supplement: acb-48-25-s003.pdf [file acb-48-25-s003.pdf]

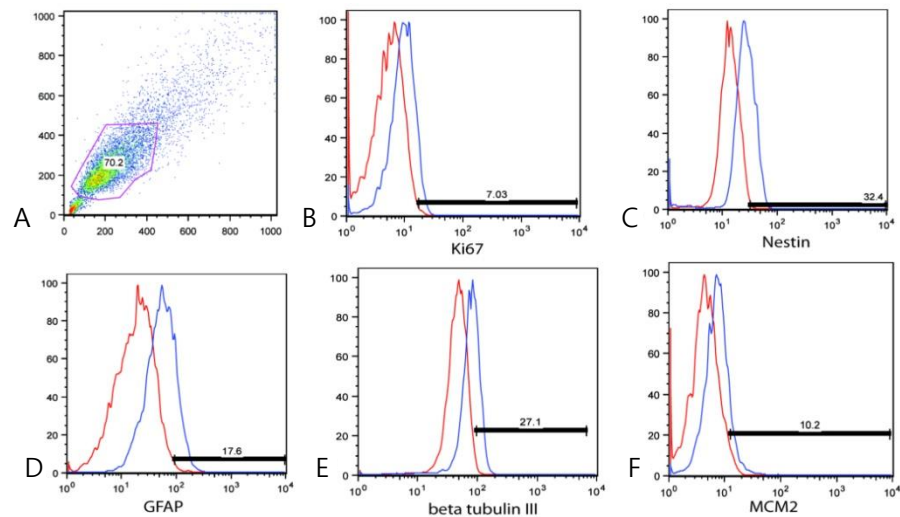

**Supplementary Fig. 3.** (A-F) Representative flow cytometry plots for marker expression using laminin cells. Positive cells were identified by applying a gate created to separate positive and negative staining cells from the controls. (B) Ki67 staining of laminin cells. (C) Nestin staining of laminin cells. (D) Glial fibrillary acidic protein (GFAP) staining of laminin cells. (E) Beta tubulin III staining of laminin cells. (F) MCM2 staining of laminin cells.
