# Supplementary material for: Neurosphere and adherent culture conditions are equivalent for malignant glioma stem cell lines
Source: PubMed Central journal article supplement — Anat Cell Biol. 2015 Mar 20;48(1):25–35. doi: 10.5115/acb.2015.48.1.25 (PMC4371178; doi:10.5115/acb.2015.48.1.25), 2015-03-20
Supplement: acb-48-25-s004.pdf [file acb-48-25-s004.pdf]

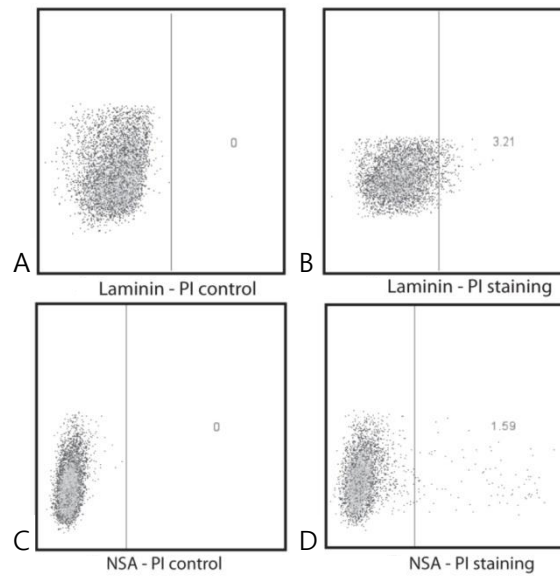

**Supplementary Fig. 4.** Representative flow cytometry plots from propidium iodide (PI) experiments. (A) Laminin cells with no PI are shown. Using the PI fluorescence of the cells, a gate was identified (line) to separate PI positive and PI negative cells. Applying this gate to the cells stained with PI (B) 3.21% of the cells were found to be PI positive/dead. (C) Neurosphere assay (NSA) cells with no PI are shown. Using the PI fluorescence of the cells, a gate was identified (line) to separate PI positive and PI negative cells. Applying this gate to the cells stained with PI (D) 1.59% of the cells were found to be PI positive/dead.
