# Supplementary material for: Neurosphere and adherent culture conditions are equivalent for malignant glioma stem cell lines
Source: PubMed Central journal article supplement — Anat Cell Biol. 2015 Mar 20;48(1):25–35. doi: 10.5115/acb.2015.48.1.25 (PMC4371178; doi:10.5115/acb.2015.48.1.25), 2015-03-20
Supplement: acb-48-25-s005.pdf [file acb-48-25-s005.pdf]

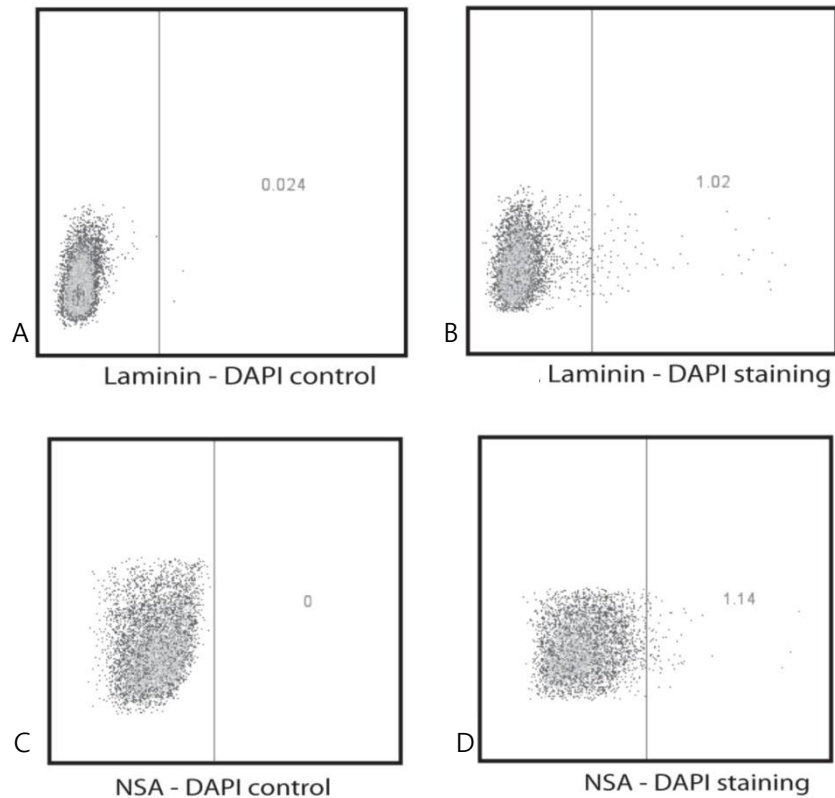

**Supplementary Fig. 5.** Representative flow cytometry plots from DAPI experiments. (A) Laminin cells with no DAPI are shown. Using the DAPI fluorescence of the cells, a gate was identified (line) to separate DAPI positive and DAPI negative cells. Applying this gate to the cells stained with DAPI (B) 1.02% of the cells were found to be DAPI positive/dead. (C) Neurosphere assay (NSA) cells with no DAPI are shown. Using the DAPI fluorescence of the cells, a gate was identified (line) to separate DAPI positive and DAPI negative cells. Applying this gate to the cells stained with DAPI (D) 1.14% of the cells were found to be DAPI positive/dead.
