# Supplementary material for: Neurosphere and adherent culture conditions are equivalent for malignant glioma stem cell lines
Source: PubMed Central journal article supplement — Anat Cell Biol. 2015 Mar 20;48(1):25–35. doi: 10.5115/acb.2015.48.1.25 (PMC4371178; doi:10.5115/acb.2015.48.1.25), 2015-03-20
Supplement: acb-48-25-s006.pdf [file acb-48-25-s006.pdf]

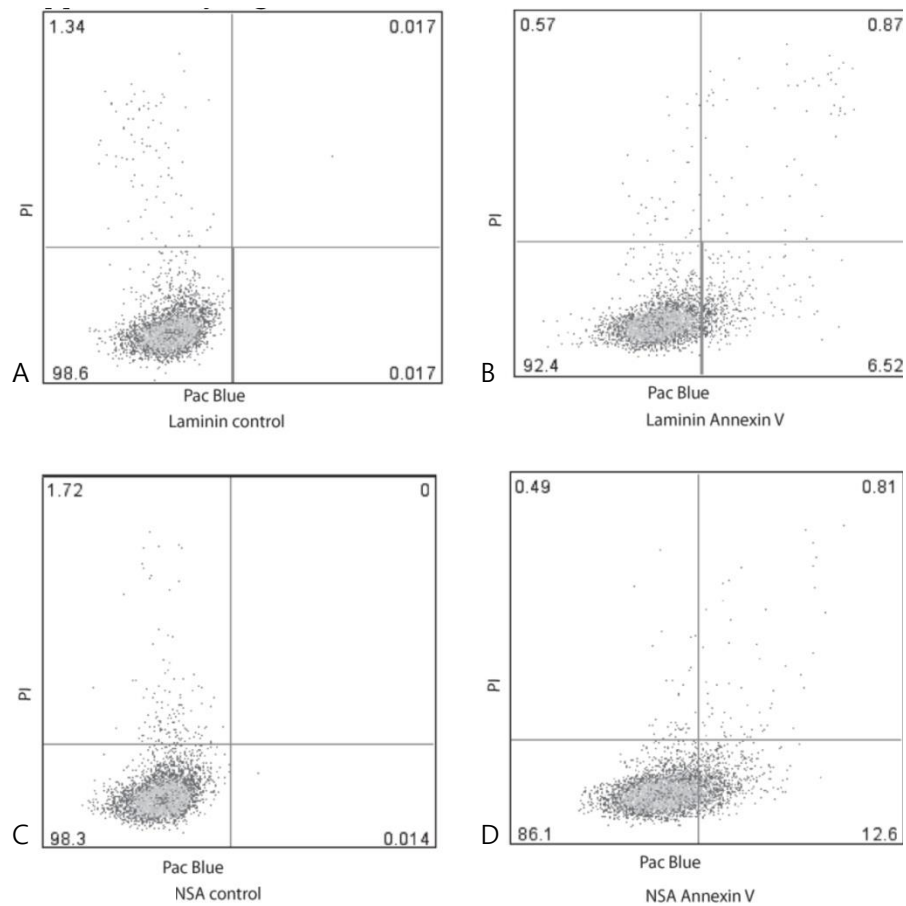

**Supplementary Fig. 6.** Flow cytometry plots demonstrating annexin V and propidium iodide (PI) staining. (A) Laminin cells stained with PI only to identify dead cells. Using the fluorescence of pacific blue (the fluorochrome conjugated to the annexin V antibody) of these cells, a gate was identified (lines) to separate live/dead cells (PI-/+ ) and annexin V -/+ cells (pacific blue -/+ ). This gate was applied to cells stained with PI and an antibody to annexin V conjugated to pacific blue (B). 6.52% of the cells were positive for annexin V and apoptotic. 0.87% of the cells were positive for annexin V but also positive for PI and therefore already dead. (C) Neurosphere assay (NSA) cells stained with PI only to identify dead cells. Using the fluorescence of pacific blue (the fluorochrome conjugated to the annexin V antibody) of these cells, a gate was identified (lines) to separate live/dead cells (PI -/+ ) and annexin V -/+ cells (pacific blue -/+ ). This gate was applied to cells stained with PI and an antibody to annexin V conjugated to pacific blue (D). 12.6% of the cells were positive for annexin V and apoptotic. 0.81% of the cells were positive for annexin V but also positive for PI and therefore already dead.
