# Supplementary material for: Neurosphere and adherent culture conditions are equivalent for malignant glioma stem cell lines
Source: PubMed Central journal article supplement — Anat Cell Biol. 2015 Mar 20;48(1):25–35. doi: 10.5115/acb.2015.48.1.25 (PMC4371178; doi:10.5115/acb.2015.48.1.25), 2015-03-20
Supplement: acb-48-25-s007.pdf [file acb-48-25-s007.pdf]

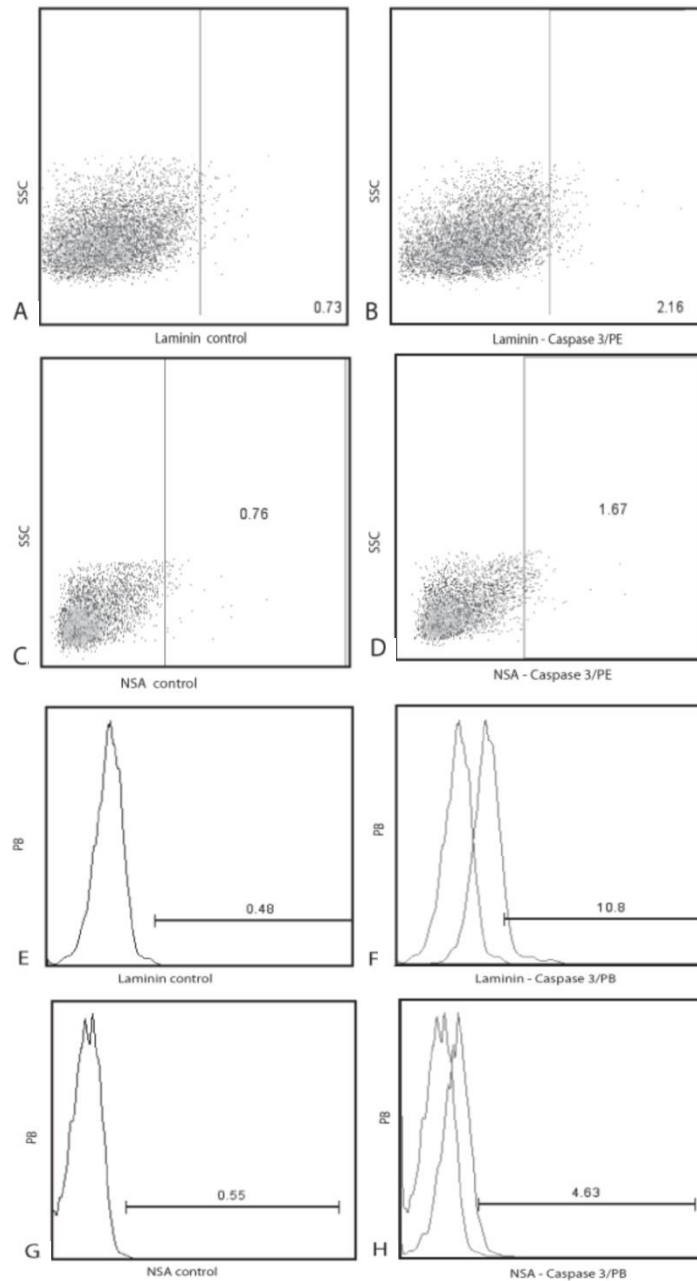

**Supplementary Fig. 7.** Flow cytometry plots demonstrating caspase activity staining glioblastoma cells grown in neurosphere assay (NSA) and laminin culture conditions. (A) Live cells without caspase 3 inhibitor. Using the PE (fluorochrome conjugated to the caspase 3 inhibitor) fluorescence of cells, a gate was identified (line) to separate PE  $-/+$  cells. Applying this gate to cells with caspase 3 inhibitor (B), 2.16% of laminin cells were found to express activated caspase 3. Similarly, a gate was chosen using live NSA control cells (C). Applying this gate to cells with caspase 3 inhibitor (D), 1.67% of cells were found to express activated caspase 3. In experiments with fixed cells, using the fluorescence of pacific blue (fluorochrome conjugated to the caspase 3 antibody) of the cells with no antibody, a gate was identified to separate pacific blue  $-/+$  cells (E, G). Applying these gates to cells with the antibody to activated caspase 3, 10.8% of laminin and 4.63% of NSA cells were found to express activated caspase 3 (F, H).
