# Supplementary material for: Neurosphere and adherent culture conditions are equivalent for malignant glioma stem cell lines
Source: PubMed Central journal article supplement — Anat Cell Biol. 2015 Mar 20;48(1):25–35. doi: 10.5115/acb.2015.48.1.25 (PMC4371178; doi:10.5115/acb.2015.48.1.25), 2015-03-20
Supplement: acb-48-25-s008.pdf [file acb-48-25-s008.pdf]

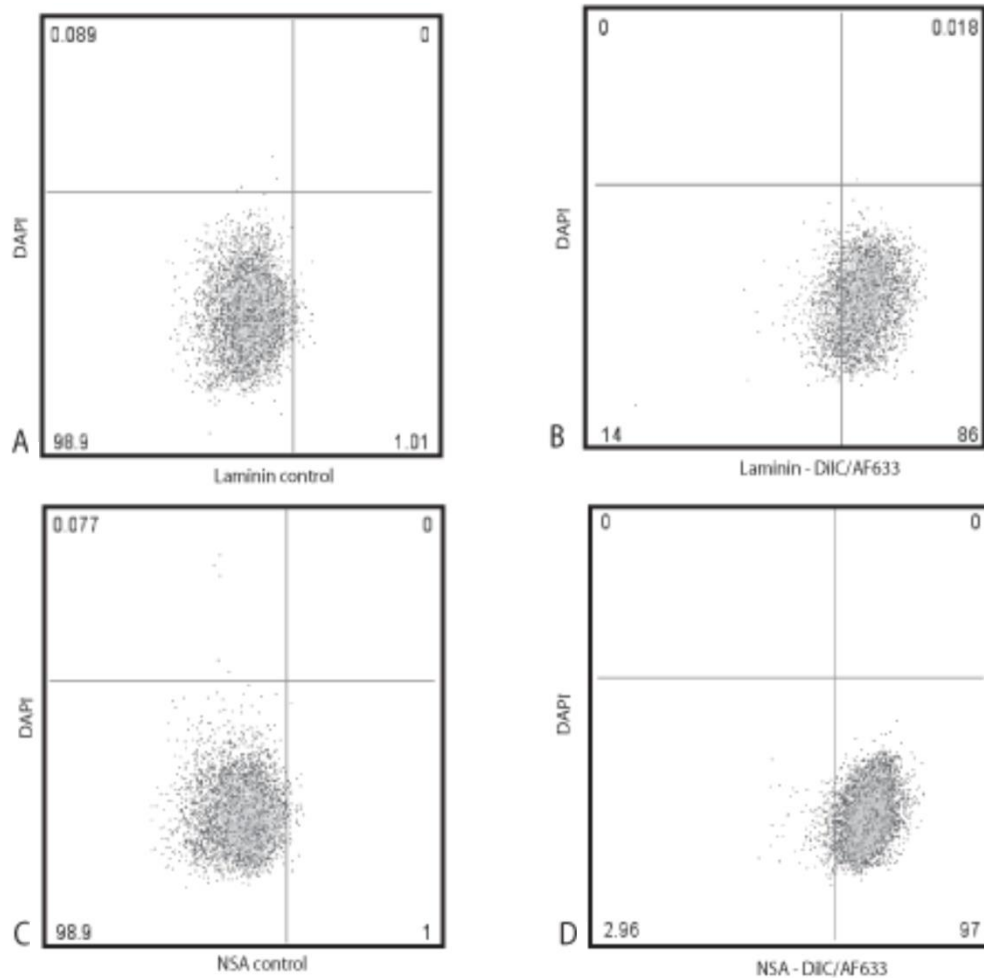

**Supplementary Fig. 8.** Flow cytometry plots showing DiIC staining in laminin and neurosphere assay (NSA) grown cells. Cells stained with DAPI only were used to choose a gate (lines) to separate live/dead cells (DAPI -/+ ) and 1,1',3,3',3',3'-hexamethylindodicarbo-cyanine iodide (DiIC) -/+ (AF633 fluorochrome -/+ ) (A, C). These gates were applied to cells stained with DAPI and DiIC conjugated to AF633 (B, D). 86% of laminin grown cells and 97% of NSA grown cells were positive for DiIC (non-apoptotic).
