# Supplementary material for: Neurosphere and adherent culture conditions are equivalent for malignant glioma stem cell lines
Source: PubMed Central journal article supplement — Anat Cell Biol. 2015 Mar 20;48(1):25–35. doi: 10.5115/acb.2015.48.1.25 (PMC4371178; doi:10.5115/acb.2015.48.1.25), 2015-03-20
Supplement: acb-48-25-s009.pdf [file acb-48-25-s009.pdf]

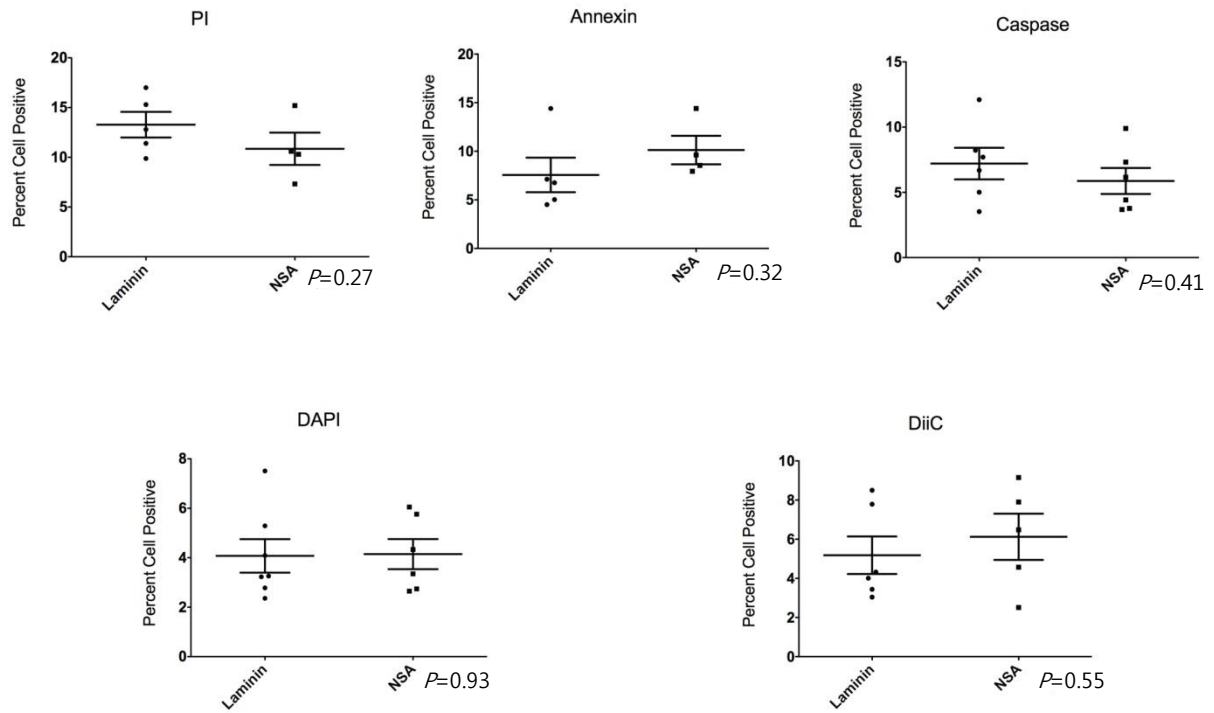

**Supplementary Fig. 9.** Summary of apoptosis experiments including propidium iodide (PI), annexin V, activated caspase 3, 4',6-diamidino-2-phenylindole (DAPI) and 1,1',3,3,3',3'-hexamethylindodicarbocyanine iodide (DiIC). No statistical differences were found between cells grown in neurosphere assay (NSA) and laminin culture conditions.
