# Supplementary material for: Neurosphere and adherent culture conditions are equivalent for malignant glioma stem cell lines
Source: PubMed Central journal article supplement — Anat Cell Biol. 2015 Mar 20;48(1):25–35. doi: 10.5115/acb.2015.48.1.25 (PMC4371178; doi:10.5115/acb.2015.48.1.25), 2015-03-20
Supplement: acb-48-25-s010.pdf [file acb-48-25-s010.pdf]

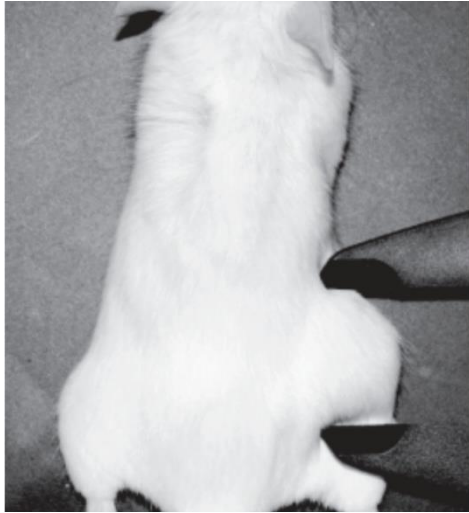

**Supplementary Fig. 10.** Mice after implantation of glioblastoma cells. Example of a subcutaneous tumor growing in the flank of a mouse.
